# Supplementary material for: Morphology–transport relationships for SBA-15 and KIT-6 ordered mesoporous silicas
Source: Royal Society of Chemistry journal article supplement (doi:10.1039/d0cp01861a), 2020-01-01
Supplement: d0cp01861a1.pdf [file d0cp01861a1.pdf]

## Electronic supplementary information (ESI)

### **Morphology–Transport Relationships for SBA-15 and KIT-6 Ordered Mesoporous Silicas†**

Janika Hochstrasser,<sup>a</sup> Artur Svidrytski,<sup>a</sup> Alexandra Höltzel,<sup>a</sup> Tatiana Priamushko,<sup>b</sup> Freddy Kleitz,<sup>b</sup> Wu Wang,<sup>c</sup> Christian Kübel<sup>c,d</sup> and Ulrich Tallarek<sup>\*a</sup>

<sup>a</sup> *Department of Chemistry, Philipps-Universität Marburg, Hans-Meerwein-Straße 4, 35032 Marburg, Germany*

<sup>b</sup> *Department of Inorganic Chemistry – Functional Materials, Faculty of Chemistry, University of Vienna, Währinger Straße 42, 1090 Vienna, Austria*

<sup>c</sup> *Institute of Nanotechnology and Karlsruhe Nano Micro Facility, Karlsruhe Institute of Technology, Hermann-von-Helmholtz-Platz 1, 76344 Eggenstein-Leopoldshafen, Germany*

<sup>d</sup> *Department of Materials and Earth Sciences, Technische Universität Darmstadt, Alarich-Weiss-Straße 2, 64287 Darmstadt, Germany*

---

\* Corresponding author.

Fax: +49-(0)6421-28-27061; E-mail: tallarek@staff.uni-marburg.de; Web: <http://www.uni-marburg.de/fb15/ag-tallarek>.

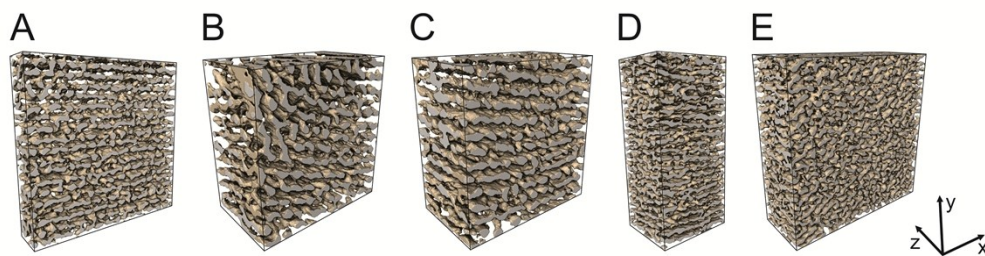

**Figure S1.**

Five blocks from different regions of the SBA-15 crumb (*cf.* Fig. 2A in the main text) used as final image stacks. Their dimensions are summarized in Table S1.

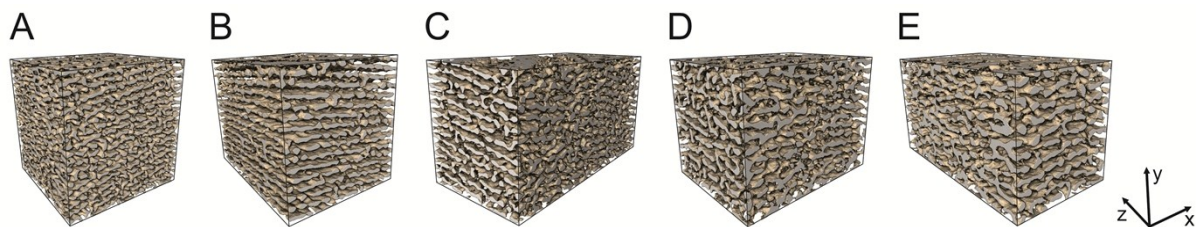

**Figure S2.**

Five blocks from different regions of the KIT-6 crumb (*cf.* Fig. 2B in the main text) used as final image stacks. Their dimensions are summarized in Table S1.

**Table S1.**

**Dimensions of the final image stacks used as geometrical models in the pore-scale simulations of hindered diffusion.**

| Image stack | SBA-15 ( $x \times y \times z$ nm <sup>3</sup> ) | KIT-6 ( $x \times y \times z$ nm <sup>3</sup> ) |
|-------------|--------------------------------------------------|-------------------------------------------------|
| A           | $196 \times 189 \times 38$                       | $212 \times 212 \times 203$                     |
| B           | $122 \times 126 \times 71$                       | $157 \times 159 \times 207$                     |
| C           | $122 \times 126 \times 71$                       | $282 \times 151 \times 144$                     |
| D           | $113 \times 243 \times 90$                       | $188 \times 138 \times 139$                     |
| E           | $235 \times 235 \times 85$                       | $116 \times 118 \times 221$                     |

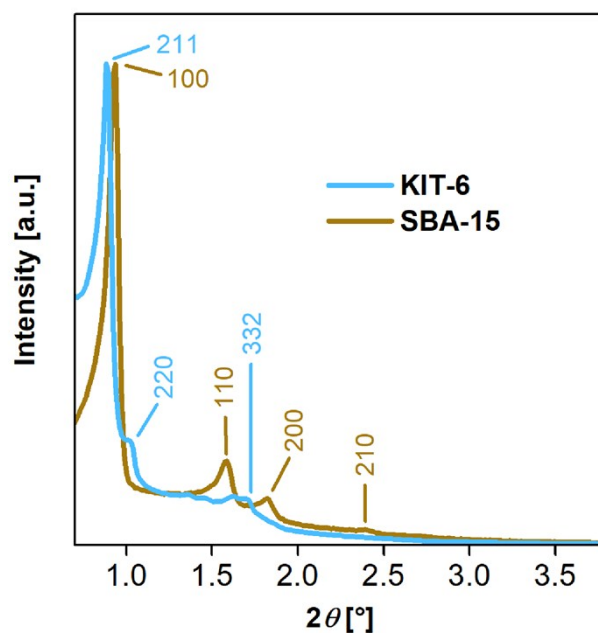

**Figure S3.**

Low-angle XRD patterns, which show the expected reflections and symmetry groups for the two materials, that is, hexagonal  $p6mm$  symmetry for SBA-15 silica and cubic  $Ia\bar{3}d$  symmetry for KIT-6 silica.

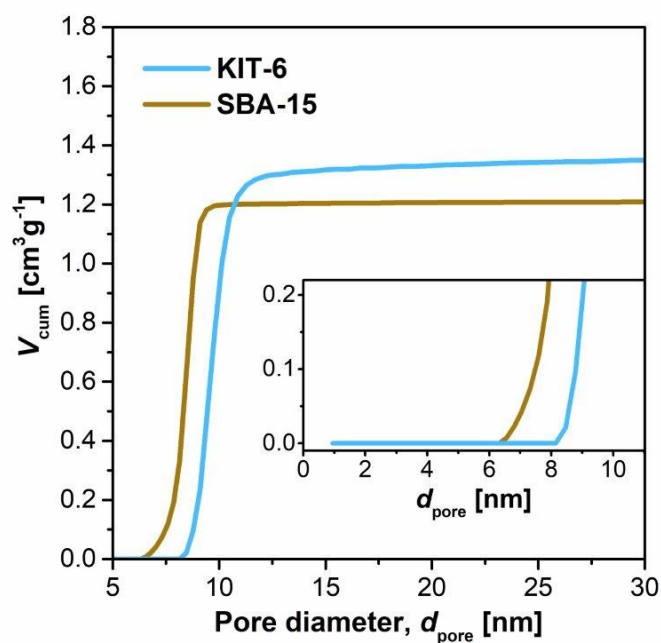

**Figure S4.**

NLDFT cumulative pore volumes for the SBA-15 and KIT-6 silica powder samples.

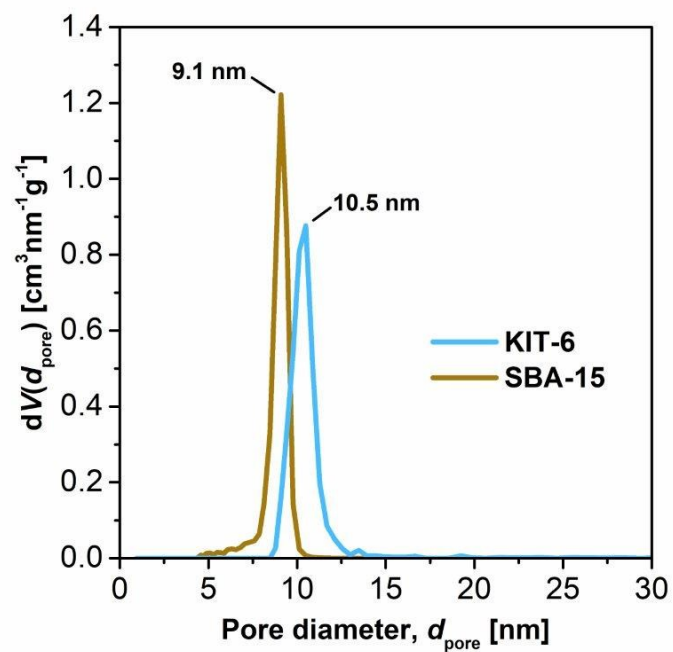

**Figure S5.**

Pore size distributions derived from the desorption branches of the physisorption isotherms.  
The  $d_{\text{meso}}$ -values for SBA-15 and KIT-6 silica refer to the mode of the distributions.
